2. Which of the following *most* likely occurs in multiple organ system failure?
  - A. Reduced proinflammatory proteins
  - B. Increased microvascular blood flow
  - C. Increased fibrin thrombus in organ capillary beds
  - D. Decreased binding of neutrophils to injured tissue
3. Which of the following statements concerning protein C is *most* likely true?
  - A. Recombinant human activated protein C is not approved by the Food and Drug Administration.
  - B. Protein C normally circulates as an inactive zymogen.
  - C. Activated protein C enhances the actions of thrombin.
  - D. Activated protein C increases thrombus formation in the microcirculation.
4. Which of the following statements concerning surgical intensive care unit (ICU) patients and protein C is *most* likely true?
  - A. Protein C concentrations are usually elevated upon admission.
  - B. Protein C concentrations correlate with the degree of organ dysfunction.
  - C. Protein C concentrations do not predict mortality.
  - D. Peak protein C concentrations occur a few days after ICU admission.
5. Patients in which of the following surgical groups are *most* likely to have *preserved* protein C concentrations during their intensive care unit stay after surgery?
  - A. Neurosurgery
  - B. Cardiothoracic surgery
  - C. Vascular surgery
  - D. Trauma

All tests and requests for Category 1 credit must be submitted through the ANESTHESIOLOGY CME Web site at <http://www.asahq.org/journal-cme>. Participants should claim credit, in 15-minute increments, for a maximum of 1 hour of CME credit per journal issue (up to 12 credits per year). Two payment options are available:

Per-year fee: ASA Members \$60.00, Non-members \$90.00

Per-issue fee: ASA Members \$10.00, Non-members \$15.00

For either option, participants may pay using VISA or MasterCard.

If you have any questions regarding the ANESTHESIOLOGY continuing medical education program, please contact Ellen M. Bateman, Ed.D., Education Specialist, at (847) 825-5586 or via e-mail at [e.bateman@asahq.org](mailto:e.bateman@asahq.org).

#### CME ERRATUM

The American Society of Anesthesiologists has withdrawn Question #6 from the May 2007 Journal CME (ANESTHESIOLOGY 2007; 106:1077-8). Editorial review of the article by Burkman *et al.*, entitled "Analysis of the Clinical Variables Associated with Recrudescence after Malignant Hyperthermia Reactions" (ANESTHESIOLOGY 2007; 106:901-6), did not yield agreement with the answers provided as possible choices. Therefore, the question is eliminated. Subscribers to May 2007 Journal CME will be given credit based on the elimination of Question #6. One credit CME will be awarded for May 2007 Journal CME as modified to five questions.
